# Supplementary material
Source: PubMed Central journal article supplement (PMC3815697)
Supplement: NIHMS510317-supplement.pdf [file NIHMS510317-supplement.pdf]

# SUPPLEMENTAL MATERIAL

## Online Supplement 1. Pulmonary Function Parameters

| <b>Cohort</b>              | <b>SScPAH<br/>(n=166)</b> | <b>SSc-ILD-PH<br/>(n=49)</b> | <b>P value</b> |
|----------------------------|---------------------------|------------------------------|----------------|
| <b>FEV1</b>                | 1.91 ± 0.60 (n=144)       | 1.47 ± 0.44 (n=45)           | <0.001         |
| <b>FEV1 ( % predicted)</b> | 78 ± 18 (n=129)           | 53 ± 13 (n=46)               | <0.001         |
| <b>FVC</b>                 | 2.52 ± 0.82 (n=145)       | 1.75 ± 0.58 (n=45)           | <0.001         |
| <b>FVC (% predicted)</b>   | 80 ± 18 (n=131)           | 50 ± 11                      | <0.001         |
| <b>FEV1/FVC</b>            | 76.4 ± 7.8 (n=144)        | 84.9 ± 8.3 (n=46)            | <0.001         |
| <b>DLCO</b>                | 10.5 ± 4.0 (n=122)        | 8.2 ± 4.2 (n=40)             | <0.001         |
| <b>DLCO (% predicted)</b>  | 52 ± 18 (n=108)           | 34 ± 14 (n=43)               | <0.001         |

\* Continuous variables shown as mean ± SD

Comparisons by student t-test or Mann-Whitney Rank Sum Test as appropriate

## Online Supplement 2. Chronic Medications

| Medication                    | IPAH<br>(n=5) | SScPAH<br>(n=7) | P-Value<br>(IPAH vs.<br>SScPAH) | SSc-no-PH<br>(n=7) | P-Value<br>(SScPAH vs.<br>SSc-no-PAH) |
|-------------------------------|---------------|-----------------|---------------------------------|--------------------|---------------------------------------|
| PDE5A<br>inhibitor            | 2 (40)        | 1 (14)          | 0.52                            | 1 (14)             | 1.0                                   |
| Endothelin<br>Antagonist      | 2 (40)        | 0 (0)           | 0.15                            | 0 (0)              | 1.0                                   |
| Intravenous<br>Prostacyclin   | 1 (20)        | 0 (0)           | 0.42                            | 0 (0)              | 1.0                                   |
| Inhaled or SQ<br>Prostacyclin | 2 (40)        | 0 (0)           | 0.15                            | 0 (0)              | 1.0                                   |
| Calcium Channel<br>Blocker    | 1(20)         | 2 (29)          | 1.0                             | 3 (43)             | 1.0                                   |
| Loop<br>Diuretic              | 3 (60)        | 1 (14)          | 0.22                            | 2 (29)             | 1.0                                   |
| Aldosterone<br>Antagonist     | 3 (60)        | 1 (14)          | 0.22                            | 2 (29)             | 1.0                                   |

PAH = Pulmonary Arterial Hypertension; PDE5A = Phosphodiesterase 5A; SQ = Subcutaneous  
Comparisons by Fisher Exact Test

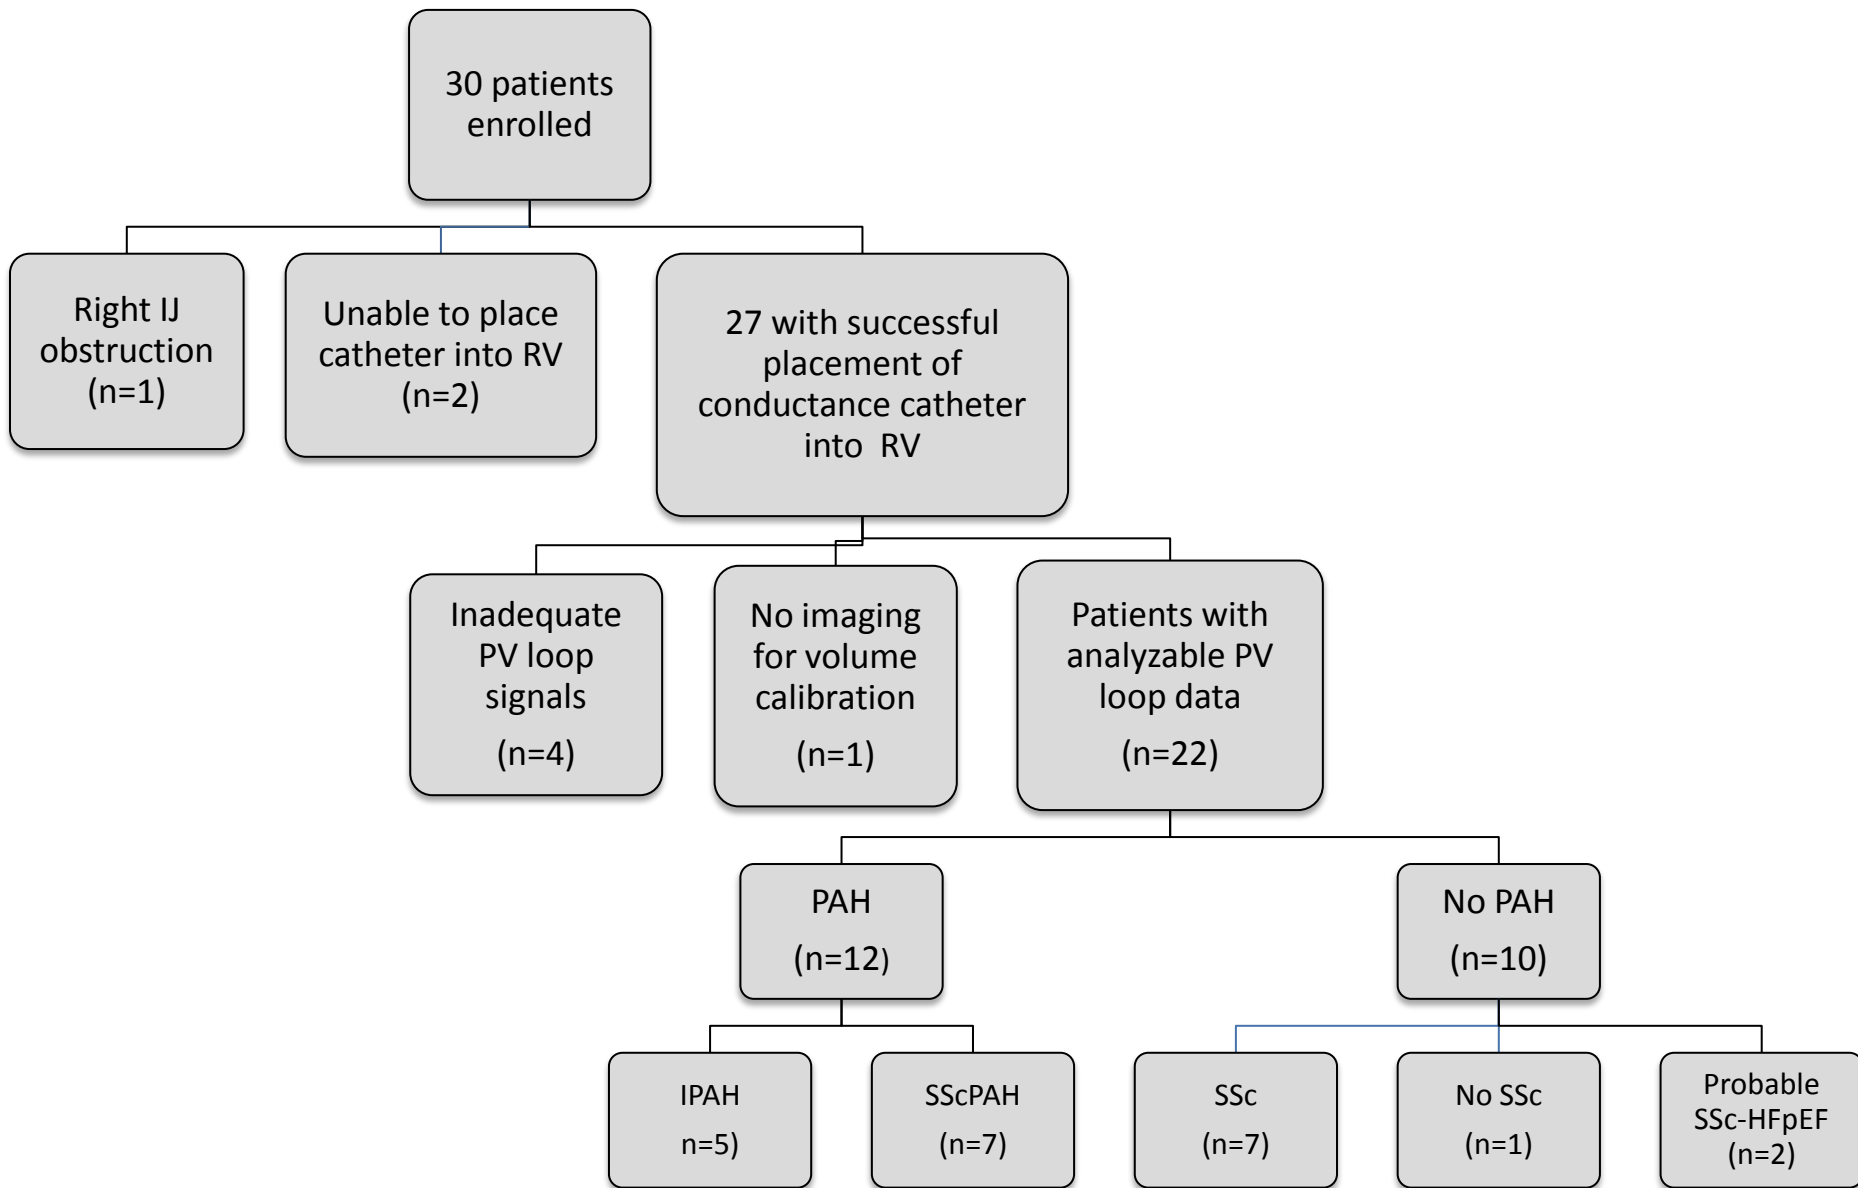



**Online Supplement 3.** Flow chart depicting patient enrollment in pressure-volume loop analysis. HFpEF = Heart failure with preserved ejection fraction.

**Online Supplement 4.** Change in Heart Rate with Valsalva maneuver. 2-4 beats are averaged just prior to initiation of Valsalva (baseline), during onset of initiation (phase 1-2), and after release maneuver (phase 3).
